# Supplementary material for: Eco-evolutionary modelling of global vegetation dynamics and the impact of CO 2 during the late Quaternary: insights from contrasting periods
Source: Copernicus journal article supplement (doi:10.5194/esd-16-1655-2025), 2025-10-09
Supplement: Supplementary file 1 [file esd-16-1655-2025-supplement.pdf]

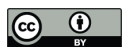

*Supplement of*

## **Eco-evolutionary modelling of global vegetation dynamics and the impact of CO<sub>2</sub> during the late Quaternary: insights from contrasting periods**

**Jierong Zhao et al.**

*Correspondence to:* Sandy P. Harrison ([s.p.harrison@reading.ac.uk](mailto:s.p.harrison@reading.ac.uk))

The copyright of individual parts of the supplement might differ from the article licence.

This Supplementary contains the following tables and figures:

Table S1. Characteristics of the Last Glacial Maximum (LGM), mid-Holocene (MH) and pre-industrial (PI) Max Planck Institute Earth System Model (MPI-ESM1.2-LR; Mauritsen et al., 2019) simulations used to provide inputs for our experiments, including specified forcings.

Table S2. Regional contributions to total annual gross primary production (GPP) in the tropics, the northern extra-tropics (NET) and the southern extra-tropics (SET) in the Last Glacial Maximum (LGM), the mid-Holocene (MH) shown in the factorial experiments holding all but one variable constant.

Table S3. Gross primary production at the Last Glacial Maximum (LGM), mid-Holocene (MH) and the pre-industrial (PI) as simulated by earth system models participating in the fourth phase of the Palaeoclimate Modelling Intercomparison Project (PMIP4; Kageyama et al., 2017; Otto-Bliesner et al., 2017).

Table S4. Summary of previous factorial experiments for the Last Glacial Maximum (LGM).

Fig. S1. Change in C<sub>4</sub> fraction (a) at the Last Glacial Maximum (LGM) compared to the pre-industrial (PI) experiment and (b) in the mid-Holocene (MH) compared to the PI experiment.

Fig. S2. Simulated change in total annual gross primary production (GPP) between the pre-industrial (PI) and (a) the Last Glacial Maximum (LGM) and (b) the mid-Holocene (MH) as a result of holding all variables constant except climate.

Fig. S3. Simulated change in total annual gross primary production (GPP) between the pre-industrial (PI) and (a) the Last Glacial Maximum (LGM) and (b) the mid-Holocene (MH) as a result of holding all variables constant except CO<sub>2</sub>.

Fig. S4. Simulated change in total annual gross primary production (GPP) between the pre-industrial (PI) and (a) the Last Glacial Maximum (LGM) and (b) the mid-Holocene (MH) as a result of holding all variables constant except light (photosynthetic photon flux density, PPFD).

Fig. S5. Simulated changes in (a) mean annual temperature and (b) mean annual precipitation between the pre-industrial (PI) and the Last Glacial Maximum (LGM); simulated changes in (c) mean annual temperature and (d) mean annual precipitations between the pre-industrial (PI) and the mid-Holocene (MH).

Fig. S6. Simulated change in C<sub>4</sub> fraction between the pre-industrial (PI) and (a) the Last Glacial Maximum (LGM) and (b) the mid-Holocene (MH) as a result of holding all variables constant except climate.

Fig. S7. Simulated change in C<sub>4</sub> fraction between the pre-industrial (PI) and (a) the Last Glacial Maximum (LGM) and (b) the mid-Holocene (MH) as a result of holding all variables constant except CO<sub>2</sub>.

Fig. S8. Simulated change in C<sub>4</sub> fraction between the pre-industrial (PI) and (a) the Last Glacial Maximum (LGM) and (b) the mid-Holocene (MH) as a result of holding all variables constant except light (photosynthetic photon flux density, PPFD).

Table S1. Characteristics of the Last Glacial Maximum (LGM), mid-Holocene (MH) and pre-industrial (PI) Max Planck Institute Earth System Model (MPI-ESM1.2-LR; Mauritsen et al., 2019) simulations used to provide inputs for our experiments, including specified forcings.

|                            | PI        | MH        | LGM                                                   |
|----------------------------|-----------|-----------|-------------------------------------------------------|
| Eccentricity               | 0.016764  | 0.018682  | 0.018994                                              |
| Obliquity (°)              | 23.459    | 24.105    | 22.949                                                |
| Perihelion -180            | 100.33    | 0.87      | 114.42                                                |
| CO <sub>2</sub> (ppm)      | 284.3     | 264.4     | 190                                                   |
| CH <sub>4</sub> (ppb)      | 808.2     | 597       | 375                                                   |
| N <sub>2</sub> O (ppb)     | 273.0     | 262       | 200                                                   |
| Ice sheet                  | as modern | as modern | ICE6G_C                                               |
| Spin-up                    | 2000      | 500       | 3850 years after restart from previous LGM simulation |
| Length of simulation (yrs) | 1000      | 500       | 500                                                   |

Table S2. Regional contributions to total annual gross primary production (GPP, PgC yr<sup>-1</sup>) in the tropics, the northern extra-tropics (NET) and the southern extra-tropics (SET) in the Last Glacial Maximum (LGM), the mid-Holocene (MH) shown in the factorial experiments holding all but one variable constant.

| <b>Region</b>      | <b>Time period</b> | <b>Climate</b> | <b>CO<sub>2</sub></b> | <b>PPFD</b> |
|--------------------|--------------------|----------------|-----------------------|-------------|
| Tropics (25°N-25S) | LGM                | -3.5           | -4.7                  | 0.2         |
| NET (>25°N)        | LGM                | -11.2          | -6.5                  | 1.0         |
| SET (>25°S)        | LGM                | -0.1           | -1.0                  | 0.0         |
| Tropics (25°N-25S) | MH                 | 0.9            | -1.2                  | -0.5        |
| NET (>25°N)        | MH                 | 1.5            | -1.2                  | 1.5         |
| SET (>25°S)        | MH                 | -0.5           | -0.2                  | 0.0         |

Table S3. Gross primary production ( $\text{Pg C yr}^{-1}$ ) at the Last Glacial Maximum (LGM), mid-Holocene (MH) and the pre-industrial (PI) as simulated by earth system models participating in the fourth phase of the Palaeoclimate Modelling Intercomparison Project (PMIP4; Kageyama et al., 2017; Otto-Bliesner et al., 2017).

| <b>Model</b>   | <b>LGM</b> | <b>MH</b> | <b>PI</b> |
|----------------|------------|-----------|-----------|
| MPI-ESM1-2-LR  | 67.8       | 116.9     | 121       |
| AWI-ESM-1-1-LR | 61.4       | 106.5     | 95        |
| INM-CM4-8      | 110.7      | 137.5     | 140.6     |
| MIROC-ES2L     | 108.6      | 146.1     | 151.7     |
| NCAR.CESM2     | n/a        | 103.8     | 115.0     |
| IPSL-CM6A-LR   | n/a        | 106.7     | 116.0     |
| NorESM2-LM     | n/a        | 123.7     | 134.2     |
| ACCESS-ESM1-5  | n/a        | 97.9      | 105.6     |
| GISS-E2-1-G    | n/a        | 106.0     | 121.1     |



Table S4. Summary of factorial experiments for the Last Glacial Maximum (LGM).

|                                  | Vegetation model | Baseline            | Baseline CO <sub>2</sub> (ppm) | LGM CO <sub>2</sub> (ppm) | Index | Baseline value (Pg C yr <sup>-1</sup> )                                  | Climate effect                                                     | CO <sub>2</sub> effect                                                   |
|----------------------------------|------------------|---------------------|--------------------------------|---------------------------|-------|--------------------------------------------------------------------------|--------------------------------------------------------------------|--------------------------------------------------------------------------|
| This study                       |                  | PI (common area)    | 280                            | 190                       | GPP   | 99.1                                                                     | –15%                                                               | –12%                                                                     |
| Chen et al. (2019)               | ORCHIDEE-MICT    | PI (total area)     | 285                            | 185                       | GPP   | 135.8                                                                    | –11%                                                               | –54%                                                                     |
| Haas et al. (2023)               | P model + BIOME4 | Modern (total area) | 395                            | 190                       | GPP   | 149.37                                                                   | MPI: –29%<br>AWI: –25%<br>CESM: –41%                               | –55%                                                                     |
| Martin Calvo and Prentice (2015) | LPX              | PI (total area)     | 280                            | 195                       | NPP   | 63.9                                                                     | –2%                                                                | –23%                                                                     |
| O'ishi and Abe-Ouchi (2013)      | MIROC-LPJ        | PI (common area)    | 285                            | 185                       | NPP   | 54                                                                       | –11%                                                               | –24%                                                                     |
| Claussen et al. (2013)           | JSBACH           | PI (total area)     | 280                            | 185                       | NPP   | 57.9                                                                     | –4%                                                                | –45%                                                                     |
| Wuillez et al. (2011)            | ORCHIDEE         | Modern (total area) | 310                            | 185                       | NPP   | TrBE: ≈570<br>TempNE: ≈500<br>TempBS: ≈640<br>BoNE: ≈ 400<br>BoBS: ≈ 760 | TrBE: 16%<br>TempNE: 8%<br>TempBS: –11%<br>BoNE: –5%<br>BoBS: –20% | TrBE: –68%<br>TempNE: –62%<br>TempBS: –39%<br>BoNE: –72.5%<br>BoBS: –42% |

#### References for factorial experiments

- Chen, W., Zhu, D., Ciais, P., Huang, C., Viovy, N., and Kageyama, M.: Response of vegetation cover to CO<sub>2</sub> and climate changes between Last Glacial Maximum and pre- industrial period in a dynamic global vegetation model, *Quat. Sci. Rev.*, 218, 293-305, <https://doi.org/10.1016/j.quascirev.2019.06.003>, 2019.
- Claussen, M., Selent, K., Brovkin, V., Raddatz, T., and Gayler, V.: Impact of CO<sub>2</sub> and climate on Last Glacial maximum vegetation – a factor separation, *Biogeosci.*, 10, 3593- 360, <https://bg.copernicus.org/articles/10/3593/2013/>, 2013.
- Haas, O., Prentice, I.C., and Harrison, S.P.: Examining the response of wildfire properties to climate and atmospheric CO<sub>2</sub> change at the Last Glacial Maximum, *Biogeosci.*, 20, 3981- 3995, <https://doi.org/10.5194/bg-20-3981-2023>, 2023.
- Martin Calvo, M., and Prentice, I.C.: Effects of fire and CO<sub>2</sub> on biogeography and primary production in glacial and modern climates, *New Phytol.*, 208, 987-994, 2015.
- O'ishi, R., and Abe-Ouchi, A.: Influence of dynamic vegetation on climate change and terrestrial carbon storage in the Last Glacial Maximum, *Clim. Past*, 9, 1571–1587, <https://doi.org/10.5194/cp-9-1571-2013>, 2013.
- Wuillez, M.-N., Kageyama, M., Krinner, G., de Noblet-Ducoudré, N., Viovy, N., and Mancip, M.: Impact of CO<sub>2</sub> and climate on the Last Glacial Maximum vegetation: results from the ORCHIDEE/IPSL models, *Clim. Past*, 7, 557–577, <https://doi.org/10.5194/cp-7-557-2011>, 2011.

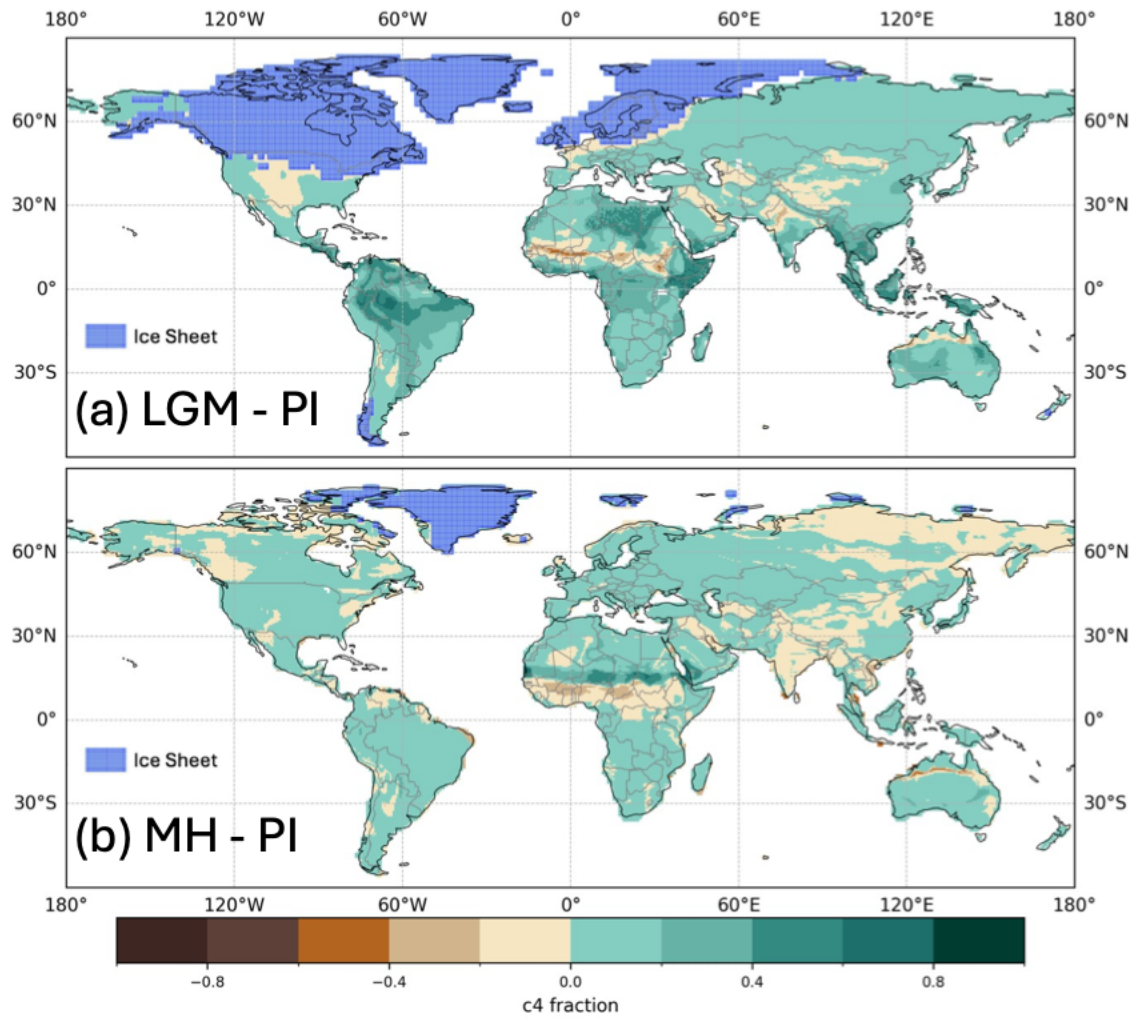

Fig. S1. Change in C4 fraction (a) at the Last Glacial Maximum (LGM) compared to the pre-industrial (PI) experiment and (b) in the mid-Holocene (MH) compared to the PI experiment.

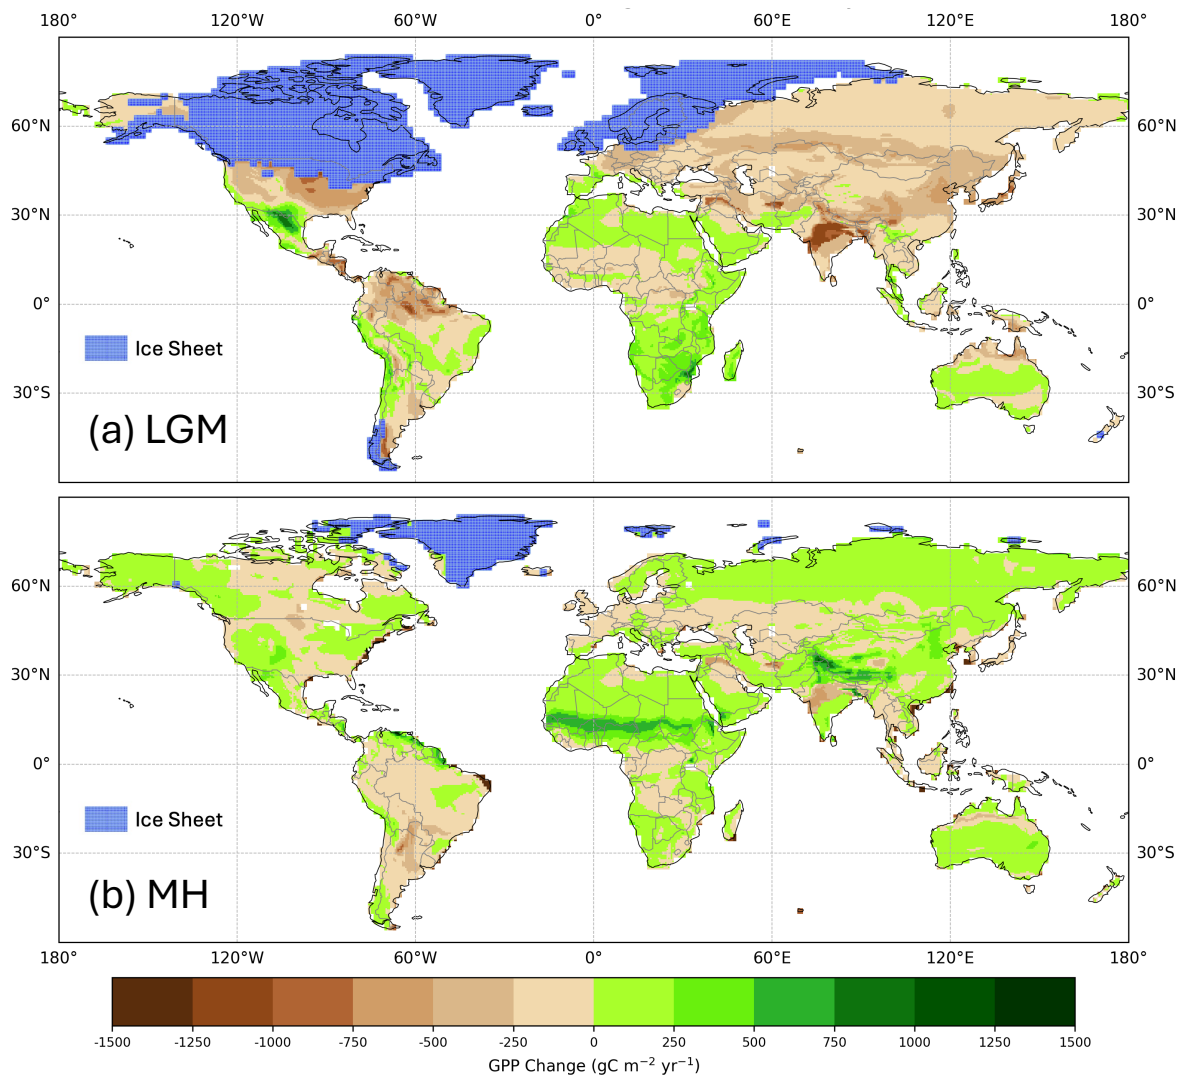

Fig. S2. Simulated change in total annual gross primary production (GPP) between the pre-industrial (PI) and (a) the Last Glacial Maximum (LGM) and (b) the mid-Holocene (MH) as a result of holding all variables constant except climate.

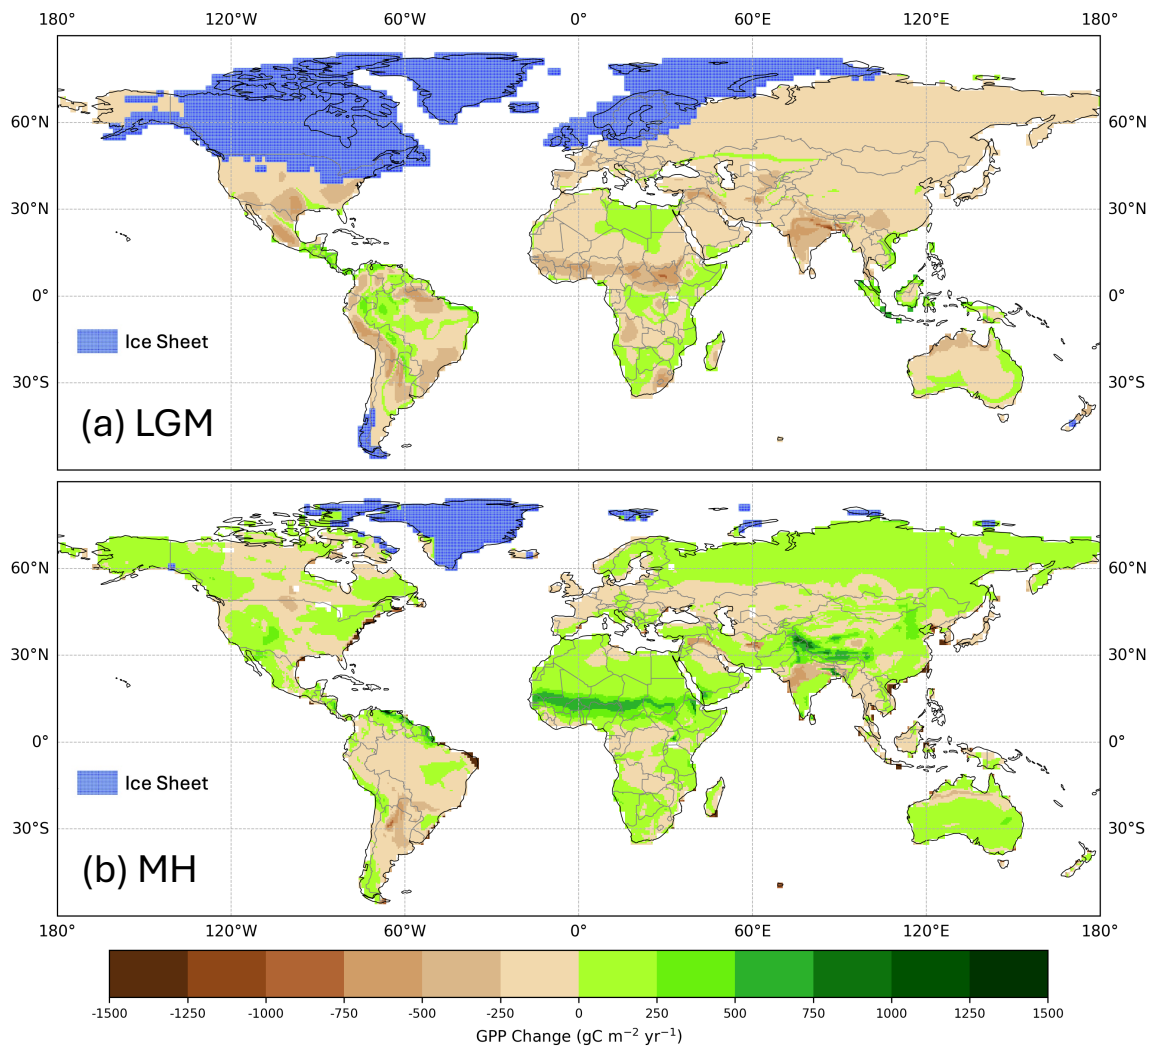

Fig. S3. Simulated change in total annual gross primary production (GPP) between the pre-industrial (PI) and (a) the Last Glacial Maximum (LGM) and (b) the mid-Holocene (MH) as a result of holding all variables constant except  $\text{CO}_2$ .

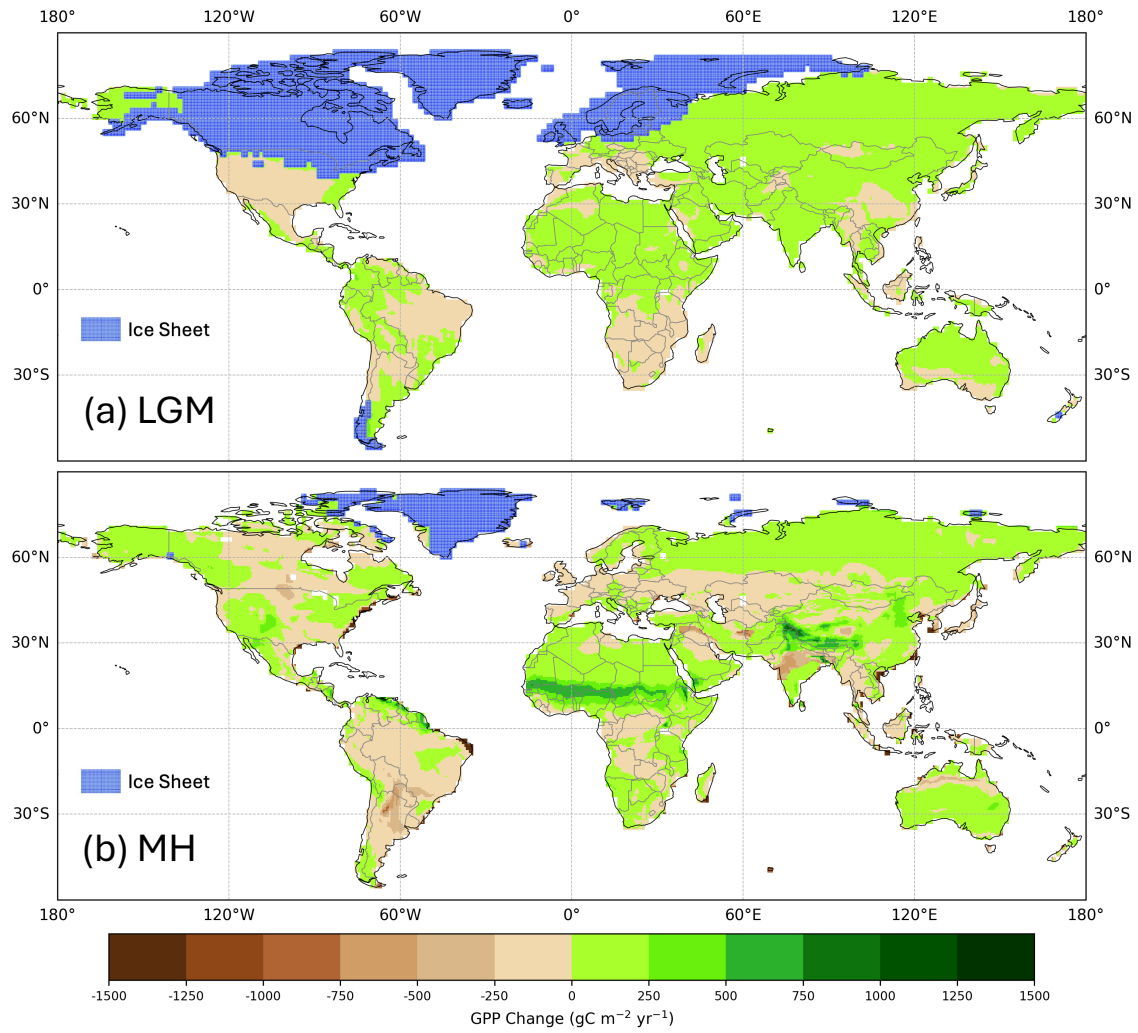

Fig. S4. Simulated change in total annual gross primary production (GPP) between the pre-industrial (PI) and (a) the Last Glacial Maximum (LGM) and (b) the mid-Holocene (MH) as a result of holding all variables constant except light (photosynthetic photon flux density, PPFD).

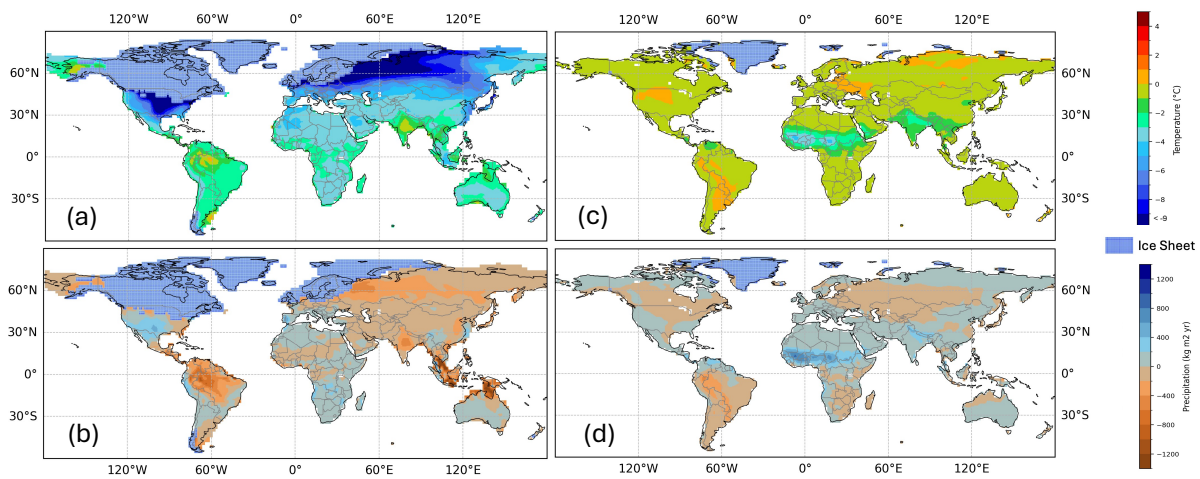

Fig. S5. Simulated changes in (a) mean annual temperature and (b) mean annual precipitation between the pre-industrial (PI) and the Last Glacial Maximum (LGM); simulated changes in (c) mean annual temperature and (d) mean annual precipitation between the pre-industrial (PI) and the mid-Holocene (MH).

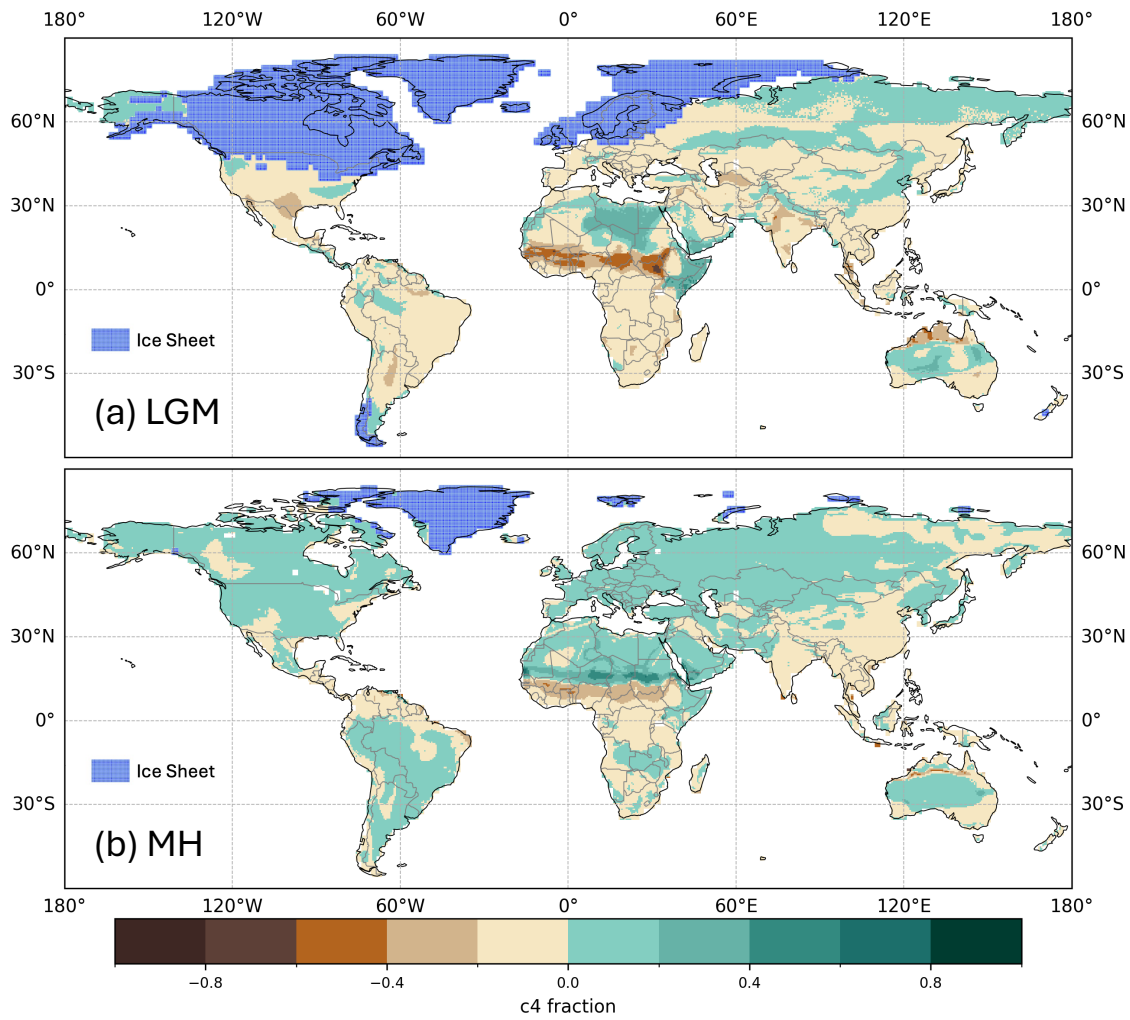

Fig. S6. Simulated change in C4 fraction between the pre-industrial (PI) and (a) the Last Glacial Maximum (LGM) and (b) the mid-Holocene (MH) as a result of holding all variables constant except climate.



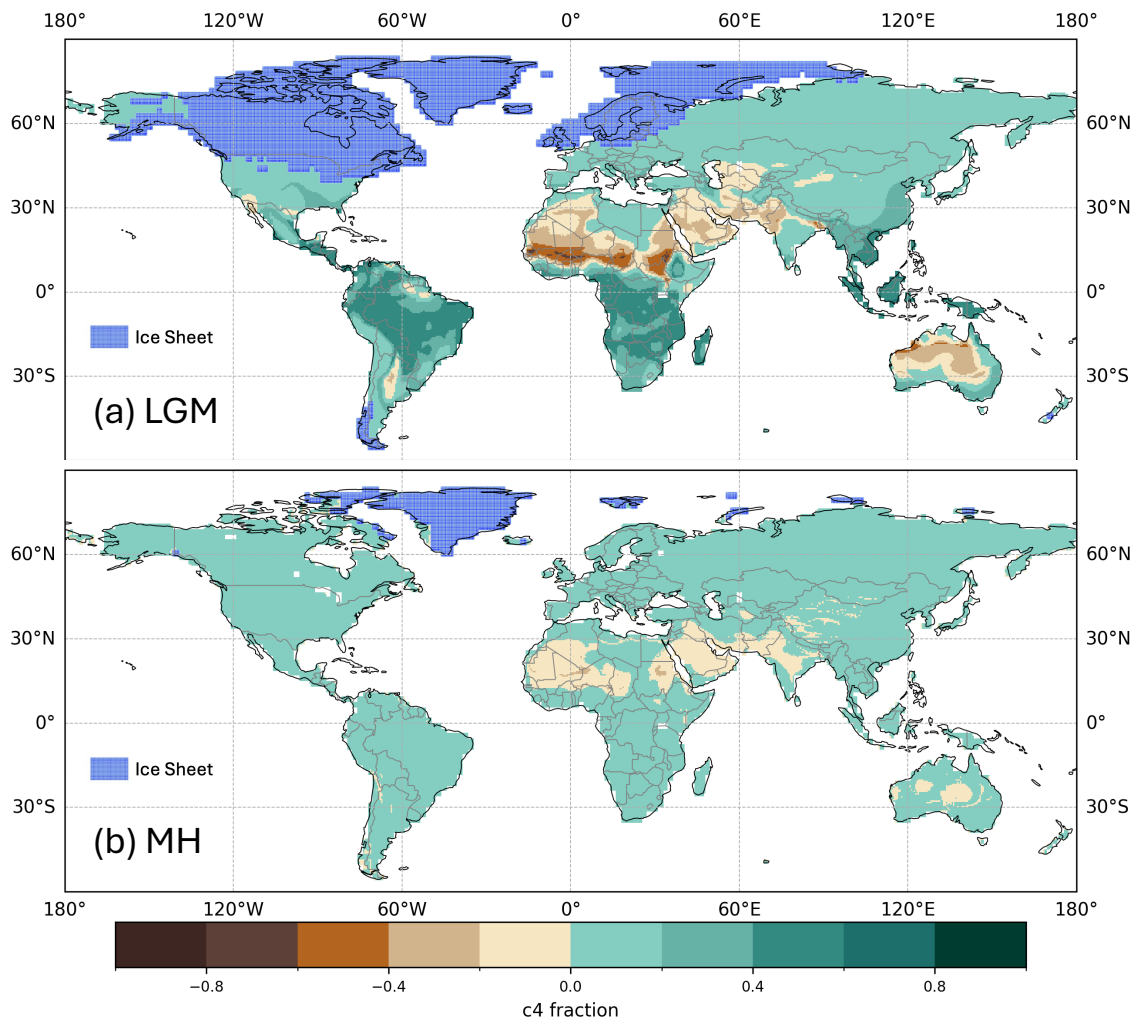

Fig. S7. Simulated change in C<sub>4</sub> fraction between the pre-industrial (PI) and (a) the Last Glacial Maximum (LGM) and (b) the mid-Holocene (MH) as a result of holding all variables constant except CO<sub>2</sub>.



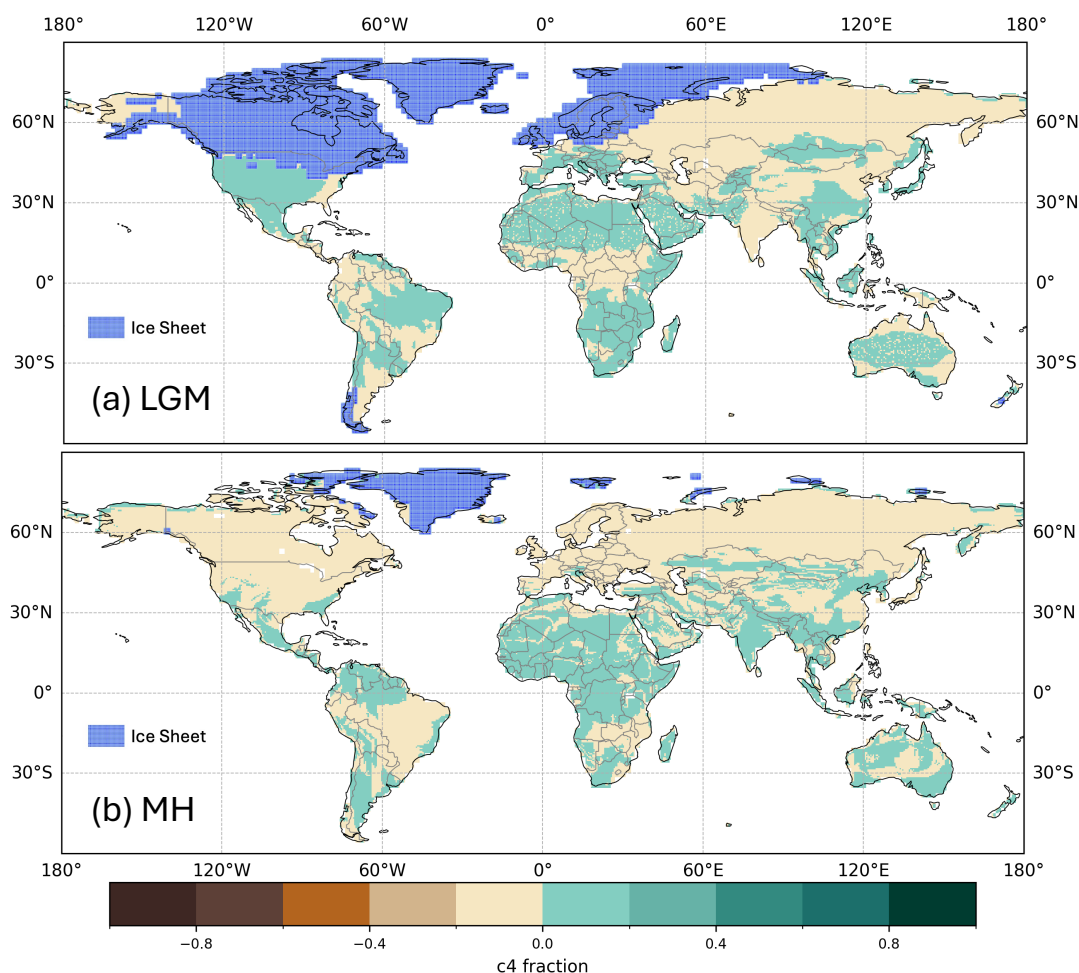

Fig. S8. Simulated change in C4 fraction between the pre-industrial (PI) and (a) the Last Glacial Maximum (LGM) and (b) the mid-Holocene (MH) as a result of holding all variables constant except light (photosynthetic photon flux density, PPFD).

### Supplementary References

- Kageyama, M., Albani, S., Braconnot, P., Harrison, S.P., Hopcroft, P.O., Ivanovic, R.F., Lambert, F., Marti, O., Peltier, W.R., Peterschmidt, J.-Y., Roche, D.M., Tarasov, L., Zhang, X., Brady, E., Haywood, A.M., LeGrande, A., Lunt, D.J., Mahowald, N.M., Mikolajewicz, U., Nisancioglu, K.H., Otto-Bliesner, B.L., Renssen, H., Tomas, B., Zhang, Q., Abe-Ouchi, A., Bartlein, P.J., Cao, J., Lohmann, G., Ohgaito, R., Shi, X., Volodin, E., Yoshida, K., Zhang, X., and Zheng, W.: The PMIP4 contribution to CMIP6 – Part 4: Scientific objectives and experimental design of the PMIP4-CMIP6 Last Glacial Maximum experiments and PMIP4 sensitivity experiments, *Geosci. Model Dev.*, 10, 4035-4055, <https://doi.org/10.5194/gmd-10-4035-2017>, 2017
- Mauritsen, T., Bader, J., Becker, T., Behrens, J., Bittner, M., Brokopf, R., et al.: Developments in the MPI-M Earth System Model version 1.2 (MPI-ESM1.2) and its response to increasing

CO<sub>2</sub>, J. Advan. Modeling Earth Systems, 11, 998–1038, <https://doi.org/10.1029/2018MS001400>, 2019.

Otto-Bliesner, B.L., Braconnot, P., Harrison, S.P., Lunt, D.J., Abe-Ouchi, A., Albani, S., Bartlein, P.J., Capron, E., Carlson, A.E., Dutton, A., Fischer, H., Goelzer, H., Govin, A., Haywood, A., Joos, F., Legrande, A.N., Lipscomb, W.H., Lohmann, G., Mahowald, N., Nehrbass-Ahles, C., Pausata, F.S.R., Peterschmidt, J-Y., Phipps, S.J., Renssen, R., and Zhang, Q.: The PMIP4 contribution to CMIP6 – Part 2: Two interglacials, scientific objective and experimental design for Holocene and Last Interglacial simulations, Geosci. Model Dev., 10, 3979-4003, <https://doi.org/10.5194/gmd-10-1-2017>, 2017
